# Supplementary material
Source: publisher site journal article supplement (https://www.dovepress.com/article/362464)

**Supplement**

[Supplement Table 1. Descriptive Statistics of SAMS for NeuroGerAdh (N = 910) 2](#_Toc100148049)

[Supplement Table 2. Descriptive Statistics of SAMS for NTX (N = 418) 3](#_Toc100148050)

[Supplement Table 3. Descriptive Statistics of SAMS for Pain (N = 260) 4](#_Toc100148051)

[Supplement Table 4. Descriptive Statistics of SAMS for Gerland et al. (N = 160) 5](#_Toc100148052)

[Supplement Table 5. Weights matrix 6](#_Toc100148053)

[Supplement Table 6. Edge betweenness centrality 7](#_Toc100148054)

[Supplement Table 7 A-C. Confirmatory Factor Analysis with different item compositions 8](#_Toc100148055)

[Supplement Figure 1. Boxplots for age in the 4 study cohorts 11](#_Toc100148056)

[Supplement Figure 2. Simple correlation network 12](#_Toc100148057)

[Supplement Figure 3. Strength stability for entire cohort network based on 1,000 case-drop bootstraps 13](#_Toc100148058)

[Supplement Figure 4. Bootstrapped 95% confidence intervals of edge weights for entire cohort network 14](#_Toc100148059)

[Supplement Figure 5. Centrality difference test, based on 1,000 parametric bootstrap samples for entire cohort network 15](#_Toc100148060)

[Supplement Figure 6. Bootstrapped difference tests (*α* = 0.05) between edge-weights that were non-zero in the estimated network for entire cohort 16](#_Toc100148061)

[Supplementary Figure 7 A-D. Separate Network Analyses for each dataset 17](#_Toc100148062)

# Supplement Table 1. Descriptive Statistics of SAMS for NeuroGerAdh (N = 910)

|  | **Missing** | **Mean** | **Std. Deviation** | **Skewness** |
| --- | --- | --- | --- | --- |
| SAMS1 | 5 | 0.452 | 0.954 | 2.320 |
| SAMS2 | 6 | 0.525 | 1.134 | 2.174 |
| SAMS3 | 9 | 0.280 | 0.807 | 3.398 |
| SAMS4 | 5 | 0.235 | 0.714 | 3.861 |
| SAMS5 | 11 | 0.512 | 1.065 | 2.151 |
| SAMS6 | 6 | 0.633 | 0.746 | 1.194 |
| SAMS7 | 8 | 0.800 | 1.299 | 1.562 |
| SAMS8 | 13 | 0.330 | 0.873 | 2.963 |
| SAMS9 | 11 | 0.305 | 0.803 | 3.086 |
| SAMS10 | 9 | 0.051 | 0.397 | 8.778 |
| SAMS11 | 8 | 0.287 | 0.815 | 3.323 |
| SAMS12 | 13 | 0.276 | 0.797 | 3.384 |
| SAMS13 | 16 | 0.188 | 0.658 | 4.251 |
| SAMS14 | 46 | 0.324 | 0.765 | 3.110 |
| SAMS15 | 84 | 0.355 | 0.776 | 2.689 |
| SAMS16 | 45 | 0.471 | 0.834 | 2.185 |
| SAMS17 | 20 | 0.170 | 0.641 | 4.632 |
| SAMS18 | 65 | 0.252 | 0.652 | 3.308 |

# Supplement Table 2. Descriptive Statistics of SAMS for NTX (N = 418)

|  | **Missing** | **Mean** | **Std. Deviation** | **Skewness** |
| --- | --- | --- | --- | --- |
| SAMS1 | 0 | 0.280 | 0.588 | 2.898 |
| SAMS2 | 0 | 0.100 | 0.372 | 4.773 |
| SAMS3 | 0 | 0.081 | 0.370 | 6.341 |
| SAMS4 | 0 | 0.041 | 0.198 | 4.668 |
| SAMS5 | 0 | 0.144 | 0.531 | 4.585 |
| SAMS6 | 0 | 0.239 | 0.449 | 1.542 |
| SAMS7 | 0 | 0.701 | 1.229 | 1.848 |
| SAMS8 | 0 | 0.067 | 0.454 | 7.973 |
| SAMS9 | 0 | 0.065 | 0.307 | 5.112 |
| SAMS10 | 0 | 0.007 | 0.085 | 11.719 |
| SAMS11 | 0 | 0.091 | 0.423 | 6.674 |
| SAMS12 | 0 | 0.091 | 0.450 | 6.404 |
| SAMS13 | 0 | 0.057 | 0.296 | 7.741 |
| SAMS14 | 0 | 0.199 | 0.542 | 3.915 |
| SAMS15 | 0 | 0.158 | 0.522 | 4.451 |
| SAMS16 | 0 | 0.263 | 0.610 | 3.230 |
| SAMS17 | 0 | 0.067 | 0.404 | 7.743 |
| SAMS18 | 0 | 0.206 | 0.510 | 3.013 |

# Supplement Table 3. Descriptive Statistics of SAMS for Pain (N = 260)

|  | **Missing** | **Mean** | **Std. Deviation** | **Skewness** |
| --- | --- | --- | --- | --- |
| SAMS1 | 0 | 0.142 | 0.519 | 4.859 |
| SAMS2 | 0 | 0.212 | 0.701 | 3.878 |
| SAMS3 | 0 | 0.119 | 0.502 | 5.016 |
| SAMS4 | 0 | 0.408 | 0.960 | 2.797 |
| SAMS5 | 0 | 0.204 | 0.658 | 4.097 |
| SAMS6 | 0 | 0.615 | 0.765 | 1.301 |
| SAMS7 | 0 | 1.185 | 1.443 | 0.948 |
| SAMS8 | 0 | 1.004 | 1.426 | 1.192 |
| SAMS9 | 0 | 0.877 | 1.274 | 1.431 |
| SAMS10 | 0 | 0.054 | 0.379 | 9.128 |
| SAMS11 | 0 | 0.685 | 1.208 | 1.738 |
| SAMS12 | 0 | 0.781 | 1.218 | 1.589 |
| SAMS13 | 0 | 0.385 | 0.904 | 2.673 |
| SAMS14 | 0 | 0.515 | 1.053 | 2.332 |
| SAMS15 | 0 | 0.354 | 0.794 | 2.491 |
| SAMS16 | 0 | 0.619 | 1.050 | 1.862 |
| SAMS17 | 0 | 0.300 | 0.826 | 3.207 |
| SAMS18 | 0 | 0.346 | 0.694 | 2.343 |

# Supplement Table 4. Descriptive Statistics of SAMS for Gerland et al. (N = 160)

|  | **Missing** | **Mean** | **Std. Deviation** | **Skewness** |
| --- | --- | --- | --- | --- |
| SAMS1 | 2 | 0.152 | 0.494 | 4.166 |
| SAMS2 | 1 | 0.113 | 0.421 | 4.845 |
| SAMS3 | 1 | 0.107 | 0.430 | 5.931 |
| SAMS4 | 1 | 0.075 | 0.265 | 3.245 |
| SAMS5 | 3 | 0.115 | 0.438 | 4.748 |
| SAMS6 | 0 | 0.506 | 0.604 | 0.756 |
| SAMS7 | 4 | 0.910 | 1.425 | 1.366 |
| SAMS8 | 0 | 0.206 | 0.664 | 4.303 |
| SAMS9 | 2 | 0.234 | 0.669 | 3.691 |
| SAMS10 | 0 | 0.044 | 0.361 | 9.532 |
| SAMS11 | 2 | 0.171 | 0.650 | 4.744 |
| SAMS12 | 6 | 0.201 | 0.680 | 4.148 |
| SAMS13 | 0 | 0.181 | 0.690 | 4.627 |
| SAMS14 | 20 | 0.386 | 0.862 | 2.928 |
| SAMS15 | 53 | 0.234 | 0.667 | 3.388 |
| SAMS16 | 28 | 0.500 | 0.929 | 2.148 |
| SAMS17 | 4 | 0.160 | 0.596 | 4.574 |
| SAMS18 | 33 | 0.299 | 0.568 | 1.767 |

# Supplement Table 5. Weights matrix

| SAMS Item | **1** | **2** | **3** | **4** | **5** | **6** | **7** | **8** | **9** | **10** | **11** | **12** | **13** | **14** | **15** | **16** | **17** | **18** |
| --- | --- | --- | --- | --- | --- | --- | --- | --- | --- | --- | --- | --- | --- | --- | --- | --- | --- | --- |
| 1 | 0.000 | 0.240 | 0.158 | 0.000 | 0.230 | 0.045 | 0.000 | 0.000 | 0.000 | 0.059 | 0.000 | 0.000 | 0.000 | 0.000 | 0.000 | 0.000 | 0.000 | 0.000 |
| 2 | 0.240 | 0.000 | 0.395 | 0.010 | 0.337 | 0.013 | 0.000 | 0.000 | 0.000 | 0.000 | 0.000 | 0.000 | 0.000 | 0.000 | 0.000 | 0.000 | 0.002 | 0.012 |
| 3 | 0.158 | 0.395 | 0.000 | 0.092 | 0.000 | 0.029 | 0.000 | 0.009 | 0.023 | 0.000 | 0.000 | 0.000 | 0.000 | 0.000 | 0.004 | 0.019 | 0.022 | 0.022 |
| 4 | 0.000 | 0.010 | 0.092 | 0.000 | 0.147 | 0.096 | 0.000 | 0.140 | 0.078 | 0.000 | 0.097 | 0.004 | 0.009 | 0.000 | 0.025 | 0.000 | 0.000 | 0.000 |
| 5 | 0.230 | 0.337 | 0.000 | 0.147 | 0.000 | 0.000 | 0.006 | 0.000 | 0.000 | 0.000 | 0.000 | 0.000 | 0.000 | 0.000 | 0.000 | 0.000 | 0.000 | 0.000 |
| 6 | 0.045 | 0.013 | 0.029 | 0.096 | 0.000 | 0.000 | 0.045 | 0.030 | 0.004 | 0.000 | 0.000 | 0.000 | 0.000 | 0.179 | 0.176 | 0.226 | 0.006 | 0.067 |
| 7 | 0.000 | 0.000 | 0.000 | 0.000 | 0.006 | 0.045 | 0.000 | 0.127 | 0.000 | 0.026 | 0.000 | 0.000 | 0.024 | 0.025 | 0.024 | 0.042 | 0.003 | 0.002 |
| 8 | 0.000 | 0.000 | 0.009 | 0.140 | 0.000 | 0.030 | 0.127 | 0.000 | 0.283 | 0.040 | 0.023 | 0.071 | 0.130 | 0.000 | 0.000 | 0.000 | 0.005 | 0.000 |
| 9 | 0.000 | 0.000 | 0.023 | 0.078 | 0.000 | 0.004 | 0.000 | 0.283 | 0.000 | 0.058 | 0.043 | 0.286 | 0.000 | 0.073 | 0.000 | 0.005 | 0.056 | 0.065 |
| 10 | 0.059 | 0.000 | 0.000 | 0.000 | 0.000 | 0.000 | 0.026 | 0.040 | 0.058 | 0.000 | 0.051 | 0.000 | 0.176 | 0.023 | 0.058 | 0.020 | 0.097 | 0.080 |
| 11 | 0.000 | 0.000 | 0.000 | 0.097 | 0.000 | 0.000 | 0.000 | 0.023 | 0.043 | 0.051 | 0.000 | 0.449 | 0.194 | 0.016 | 0.000 | 0.034 | 0.022 | 0.000 |
| 12 | 0.000 | 0.000 | 0.000 | 0.004 | 0.000 | 0.000 | 0.000 | 0.071 | 0.286 | 0.000 | 0.449 | 0.000 | 0.155 | 0.000 | 0.026 | 0.012 | 0.022 | 0.028 |
| 13 | 0.000 | 0.000 | 0.000 | 0.009 | 0.000 | 0.000 | 0.024 | 0.130 | 0.000 | 0.176 | 0.194 | 0.155 | 0.000 | 0.000 | 0.064 | 0.005 | 0.329 | 0.000 |
| 14 | 0.000 | 0.000 | 0.000 | 0.000 | 0.000 | 0.179 | 0.025 | 0.000 | 0.073 | 0.023 | 0.016 | 0.000 | 0.000 | 0.000 | 0.154 | 0.072 | 0.028 | 0.089 |
| 15 | 0.000 | 0.000 | 0.004 | 0.025 | 0.000 | 0.176 | 0.024 | 0.000 | 0.000 | 0.058 | 0.000 | 0.026 | 0.064 | 0.154 | 0.000 | 0.165 | 0.010 | 0.035 |
| 16 | 0.000 | 0.000 | 0.019 | 0.000 | 0.000 | 0.226 | 0.042 | 0.000 | 0.005 | 0.020 | 0.034 | 0.012 | 0.005 | 0.072 | 0.165 | 0.000 | 0.054 | 0.051 |
| 17 | 0.000 | 0.002 | 0.022 | 0.000 | 0.000 | 0.006 | 0.003 | 0.005 | 0.056 | 0.097 | 0.022 | 0.022 | 0.329 | 0.028 | 0.010 | 0.054 | 0.000 | 0.127 |
| 18 | 0.000 | 0.012 | 0.022 | 0.000 | 0.000 | 0.067 | 0.002 | 0.000 | 0.065 | 0.080 | 0.000 | 0.028 | 0.000 | 0.089 | 0.035 | 0.051 | 0.127 | 0.000 |

# Supplement Table 6. Edge betweenness centrality

| **From** | **To** | **Betweenness** | **From** | **To** | **Betweenness** |
| --- | --- | --- | --- | --- | --- |
| SAMS 4 | SAMS 5 | 35 | SAMS 1 | SAMS 10 | 9 |
| SAMS 4 | SAMS 6 | 27 | SAMS 12 | SAMS 13 | 8 |
| SAMS 4 | SAMS 8 | 27 | SAMS 17 | SAMS 18 | 8 |
| SAMS 13 | SAMS 17 | 19 | SAMS 13 | SAMS 15 | 6 |
| SAMS 8 | SAMS 13 | 17 | SAMS 11 | SAMS 13 | 5 |
| SAMS 2 | SAMS 5 | 14 | SAMS 14 | SAMS 15 | 5 |
| SAMS 7 | SAMS 8 | 14 | SAMS 6 | SAMS 18 | 5 |
| SAMS 9 | SAMS 12 | 13 | SAMS 10 | SAMS 15 | 4 |
| SAMS 8 | SAMS 9 | 13 | SAMS 10 | SAMS 18 | 4 |
| SAMS 3 | SAMS 4 | 12 | SAMS 1 | SAMS 2 | 3 |
| SAMS 1 | SAMS 5 | 12 | SAMS 14 | SAMS 18 | 3 |
| SAMS 4 | SAMS 11 | 12 | SAMS 1 | SAMS 3 | 3 |
| SAMS 6 | SAMS 5 | 12 | SAMS 15 | SAMS 16 | 2 |
| SAMS 6 | SAMS 14 | 11 | SAMS 2 | SAMS 3 | 2 |
| SAMS 9 | SAMS 14 | 10 | SAMS 16 | SAMS 17 | 2 |
| SAMS 10 | SAMS 13 | 10 | SAMS 6 | SAMS 7 | 2 |
| SAMS 11 | SAMS 12 | 10 | SAMS 9 | SAMS 18 | 1 |
| SAMS 6 | SAMS 15 | 10 | SAMS 7 | SAMS 16 | 1 |
| All others = 0 | | | | | |

# Supplement Table 7 A-C. Confirmatory Factor Analysis with different item compositions

**A**

| **CFA A: Item 7 and 4 in the Modification I factor** | | | | | | | |
| --- | --- | --- | --- | --- | --- | --- | --- |
| **Factor** | **Indicator** | **Estimate** | **Std. Error** | **z-value** | ***p*** | **Upper CI** | **Lower CI** |
| Modification I | SAMS4 | 0.694 | 0.019 | 37.013 | < .001 | 0.657 | 0.731 |
| SAMS8 | 0.776 | 0.015 | 51.327 | < .001 | 0.746 | 0.805 |
| SAMS9 | 0.828 | 0.014 | 59.153 | < .001 | 0.801 | 0.856 |
| SAMS11 | 0.862 | 0.014 | 63.071 | < .001 | 0.835 | 0.889 |
| SAMS12 | 0.914 | 0.013 | 68.803 | < .001 | 0.887 | 0.940 |
| SAMS7 | 0.419 | 0.017 | 23.943 | < .001 | 0.385 | 0.453 |
| Knowledge | SAMS1 | 0.787 | 0.017 | 45.411 | < .001 | 0.753 | 0.801 |
| SAMS2 | 0.919 | 0.018 | 50.397 | < .001 | 0.883 | 0.690 |
| SAMS3 | 0.875 | 0.020 | 44.606 | < .001 | 0.837 | 0.763 |
| SAMS5 | 0.772 | 0.018 | 41.927 | < .001 | 0.736 | 0.749 |
| Forgetting | SAMS6 | 0.766 | 0.018 | 43.220 | < .001 | 0.731 | 0.801 |
| SAMS14 | 0.651 | 0.020 | 33.231 | < .001 | 0.613 | 0.690 |
| SAMS15 | 0.724 | 0.020 | 35.985 | < .001 | 0.685 | 0.763 |
| SAMS16 | 0.712 | 0.018 | 38.513 | < .001 | 0.676 | 0.749 |
| Modification II | SAMS10 | 0.761 | 0.023 | 33.202 | < .001 | 0.716 | 0.806 |
| SAMS13 | 0.906 | 0.019 | 47.504 | < .001 | 0.869 | 0.944 |
| SAMS17 | 0.790 | 0.019 | 41.969 | < .001 | 0.753 | 0.827 |
| SAMS18 | 0.548 | 0.019 | 28.469 | < .001 | 0.510 | 0.586 |
| **Fit Indices** | | | | **Chi2 Test** | | | |
| **Index** | **CFI** | **TLI** | **RMSEA** | **Model** | **X2** | **Df** | **p** |
| Value | 0.987 | 0.984 | 0.040 | Baseline | 23328.275 | 153 | < .001 |
|  | | | | Factor | 439.768 | 129 |

**Abbreviations:** CI, Confidence Interval; CFI, Comparative Fit Index; Df, degrees of freedom; RMSEA, Root Mean Squared Error of Approximation; TLI, Tucker-Lewis-Index

B

| **CFA B: Item 7 not in the Modification I Factor** | | | | | | | |
| --- | --- | --- | --- | --- | --- | --- | --- |
| **Factor** | **Indicator** | **Estimate** | **Std. Error** | **z-value** | ***p*** | **Upper CI** | **Lower CI** |
| Modification I | SAMS4 | 0.699 | 0.019 | 36.498 | < .001 | 0.662 | 0.737 |
| SAMS8 | 0.774 | 0.015 | 50.464 | < .001 | 0.744 | 0.804 |
| SAMS9 | 0.836 | 0.014 | 58.848 | < .001 | 0.808 | 0.864 |
| SAMS11 | 0.870 | 0.014 | 62.743 | < .001 | 0.843 | 0.897 |
| SAMS12 | 0.917 | 0.013 | 68.224 | < .001 | 0.891 | 0.944 |
| Knowledge | SAMS1 | 0.787 | 0.017 | 45.300 | < .001 | 0.753 | 0.821 |
| SAMS2 | 0.920 | 0.018 | 50.234 | < .001 | 0.884 | 0.956 |
| SAMS3 | 0.872 | 0.020 | 44.365 | < .001 | 0.834 | 0.911 |
| SAMS5 | 0.772 | 0.018 | 41.836 | < .001 | 0.736 | 0.808 |
| Forgetting | SAMS6 | 0.767 | 0.018 | 42.593 | < .001 | 0.732 | 0.802 |
| SAMS14 | 0.650 | 0.020 | 32.756 | < .001 | 0.611 | 0.689 |
| SAMS15 | 0.725 | 0.020 | 35.563 | < .001 | 0.685 | 0.765 |
| SAMS16 | 0.711 | 0.019 | 37.890 | < .001 | 0.674 | 0.748 |
| Modification II | SAMS10 | 0.757 | 0.023 | 32.867 | < .001 | 0.712 | 0.802 |
| SAMS13 | 0.909 | 0.019 | 47.242 | < .001 | 0.872 | 0.947 |
| SAMS17 | 0.790 | 0.019 | 41.687 | < .001 | 0.753 | 0.827 |
| SAMS18 | 0.548 | 0.019 | 28.164 | < .001 | 0.510 | 0.586 |
| **Fit Indices** | | | | **Chi2 Test** | | | |
|  | **CFI** | **TLI** | **RMSEA** | **Model** | **X2** | **Df** | **p** |
| Value | 0.989 | 22711.519 | 0.038 | Baseline | 23328.275 | 138 | < .001 |
|  | | | | Factor | 360.155 | 113 |

**Abbreviations:** CI, Confidence Interval; CFI, Comparative Fit Index; Df, degrees of freedom; RMSEA, Root Mean Squared Error of Approximation; TLI, Tucker-Lewis-Index

**C**

| **CFA C: Item 4 not in the Modification I factor** | | | | | | | |
| --- | --- | --- | --- | --- | --- | --- | --- |
| **Factor** | **Indicator** | **Estimate** | **Std. Error** | **z-value** | ***p*** | **Upper CI** | **Lower CI** |
| Modification I | SAMS8 | 0.782 | 0.015 | 49.535 | < .001 | 0.751 | 0.813 |
| SAMS9 | 0.834 | 0.014 | 57.465 | < .001 | 0.806 | 0.863 |
| SAMS11 | 0.867 | 0.014 | 61.288 | < .001 | 0.839 | 0.895 |
| SAMS12 | 0.923 | 0.018 | 66.892 | < .001 | 0.896 | 0.951 |
| SAMS7 | 0.424 | 0.018 | 22.989 | < .001 | 0.388 | 0.460 |
| Knowledge | SAMS1 | 0.793 | 0.019 | 45.032 | < .001 | 0.758 | 0.827 |
| SAMS2 | 0.921 | 0.020 | 49.615 | < .001 | 0.885 | 0.957 |
| SAMS3 | 0.870 | 0.019 | 43.854 | < .001 | 0.831 | 0.908 |
| SAMS5 | 0.768 | 0.018 | 41.283 | < .001 | 0.732 | 0.805 |
| Forgetting | SAMS6 | 0.753 | 0.020 | 41.542 | < .001 | 0.718 | 0.789 |
| SAMS14 | 0.654 | 0.021 | 32.456 | < .001 | 0.614 | 0.693 |
| SAMS15 | 0.725 | 0.019 | 35.033 | < .001 | 0.684 | 0.766 |
| SAMS16 | 0.724 | 0.023 | 37.853 | < .001 | 0.687 | 0.762 |
| Modification II | SAMS10 | 0.762 | 0.019 | 33.000 | < .001 | 0.717 | 0.807 |
| SAMS13 | 0.904 | 0.019 | 46.997 | < .001 | 0.866 | 0.941 |
| SAMS17 | 0.792 | 0.020 | 41.516 | < .001 | 0.755 | 0.830 |
| SAMS18 | 0.549 | 0.015 | 28.016 | < .001 | 0.510 | 0.587 |
| **Fit Indices** | | | | **Chi2 Test** | | | |
| **Index** | **CFI** | **TLI** | **RMSEA** | **Model** | **X2** | **Df** | **p** |
| Value | 0.992 | 21752.934 | 0.032 | Baseline | 23328.275 | 136 | < .001 |
|  | | | | Factor | 286.046 | 113 |

**Abbreviations:** CI, Confidence Interval; CFI, Comparative Fit Index; Df, degrees of freedom; RMSEA, Root Mean Squared Error of Approximation; TLI, Tucker-Lewis-Index

# Supplement Figure 1. Boxplots for age in the 4 study cohorts


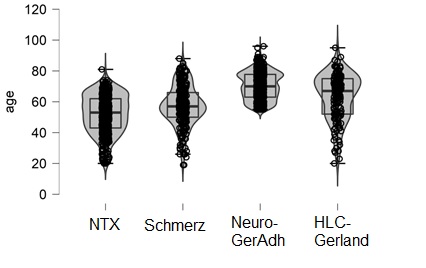


# Supplement Figure 2. Simple correlation network


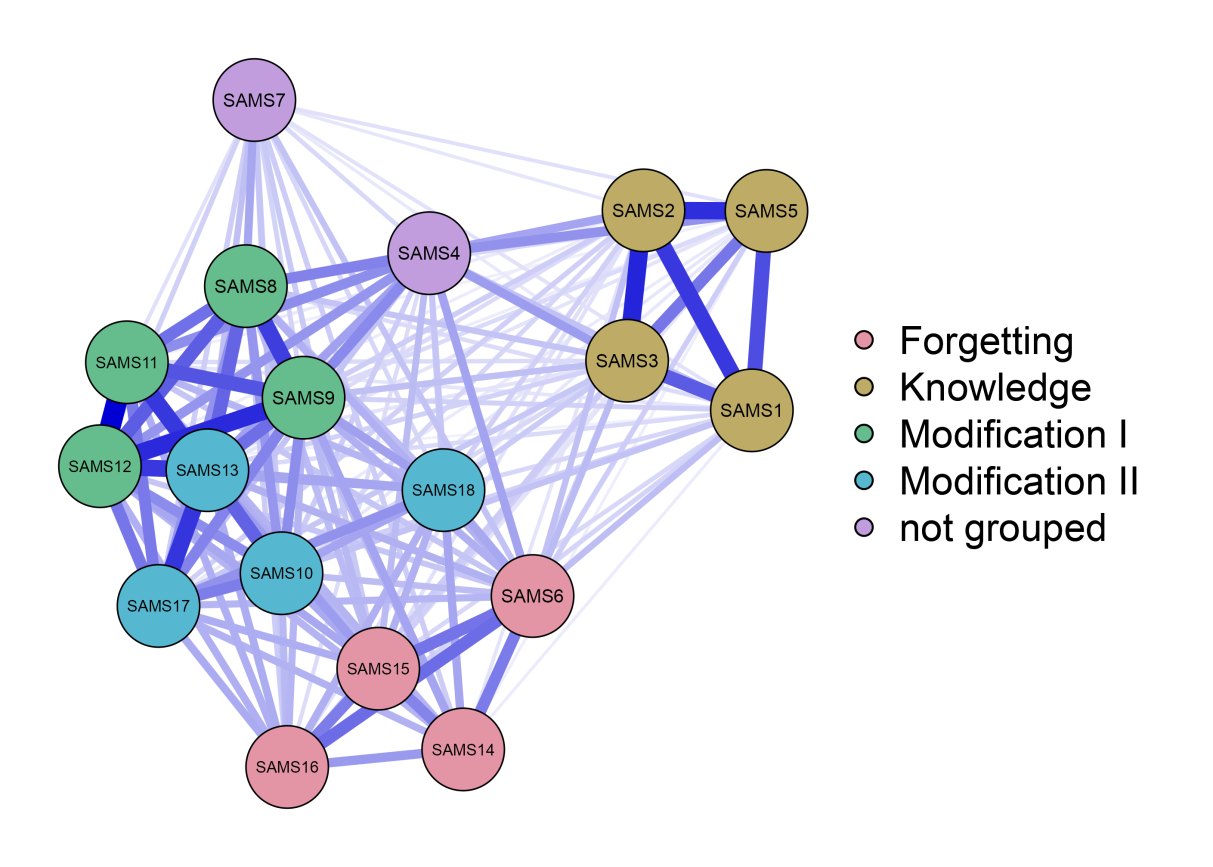


**Note**: In this network, all significant and non-significant edges are shown.

# Supplement Figure 3. Strength stability for entire cohort network based on 1,000 case-drop bootstraps


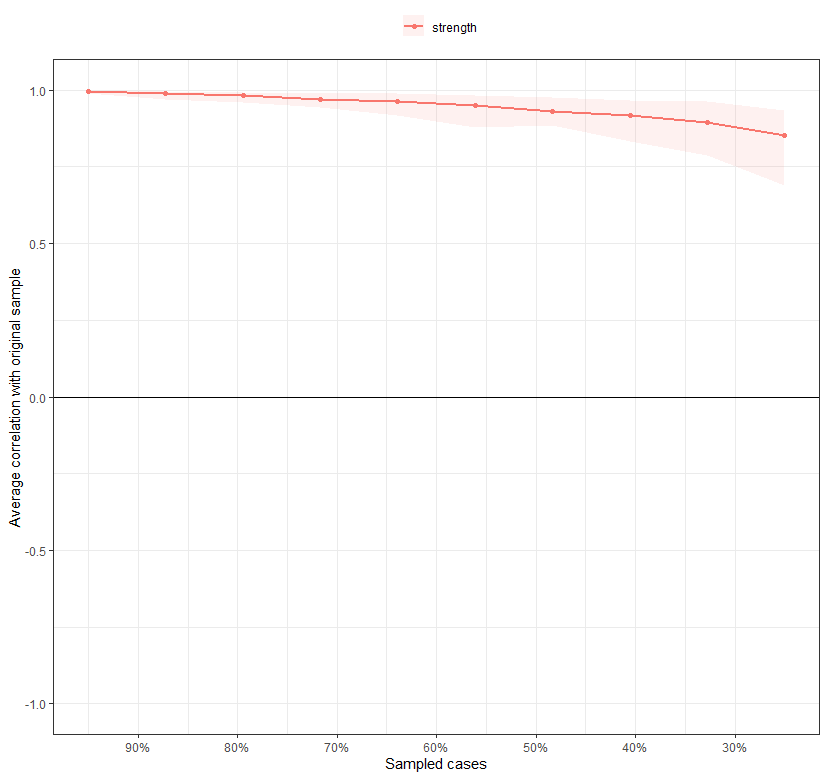


Note: To investigate the stability of the strength centrality index, a case-dropping bootstrap procedure was used (Epskamp, Borsboom, und Fried 2018). This re-estimates strength with an increasingly higher percentage of dropped-out cases. Then the correlation between the original strength index and those from the subsamples were calculated. Also the correlation stability coefficient (CS-coefficient) represents the maximum proportion of cases which can be dropped to maintain a correlation of at least .70 with the original centrality indices. The case-dropping bootstrap procedure shows that CS-Cs of node strength was 0.75.

# Supplement Figure 4. Bootstrapped 95% confidence intervals of edge weights for entire cohort network


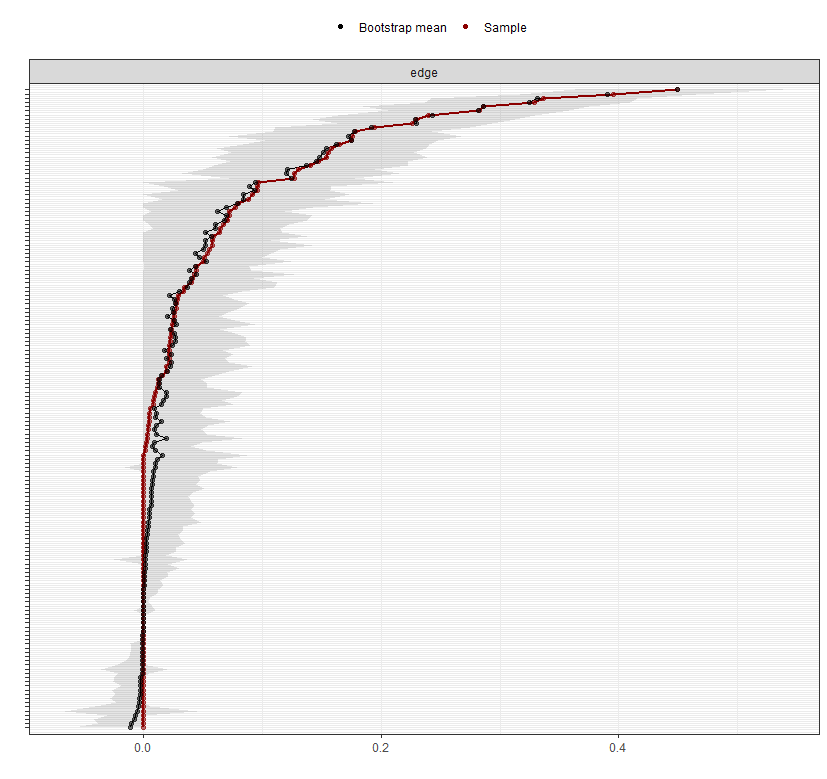


Note: Bootstrapped 95% confidence intervals of edge weights, based on 1,000 nonparametric bootstrap samples: A nonparametric bootstrap method and construction of 95% bootstrapped confidence interval around the regularized edge weight were used to investigate the stability of edge weight parameters. The red dots represent the original sample values. The black dots represent the bootstrap means, and the grey areas represent the 95% bootstrapped confidence interval. The bootstrapped confidence interval is very narrow, suggesting highly stable and interpretable results.

# Supplement Figure 5. Centrality difference test, based on 1,000 parametric bootstrap samples for entire cohort network


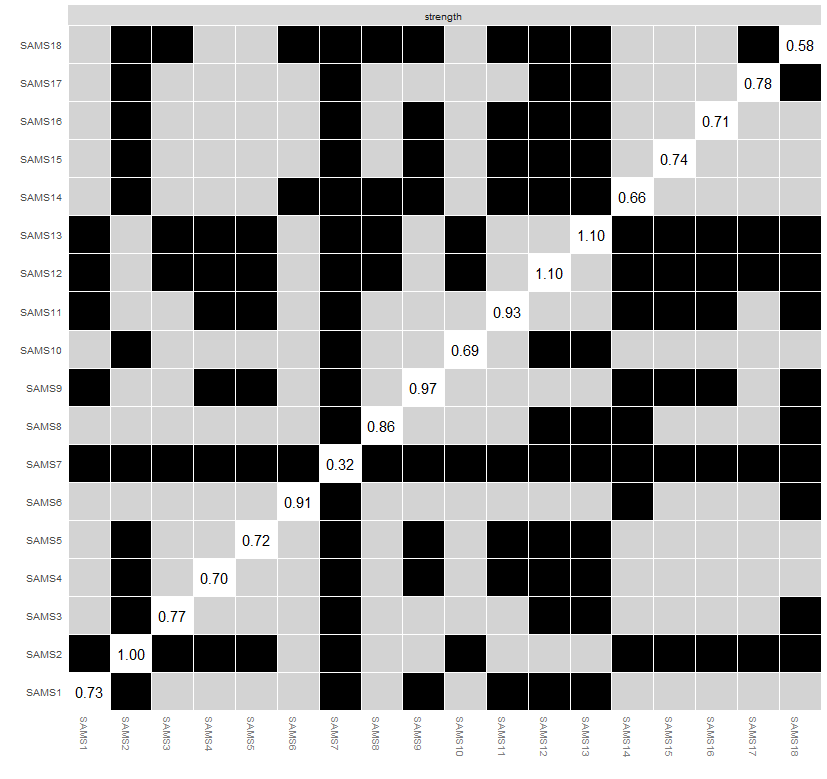


Note: A bootstrap stability difference test (á = 0.05) was used to explore if the nodes were significantly different than each other in terms of strength centrality. Each point on the x and y axes represents a network node. Gray boxes indicate that two nodes do not significantly differ from each other. Black boxes indicate that two nodes significantly differ from each other. The numbers in the diagonal represent the values of the strength centrality measure of the node.

# Supplement Figure 6. Bootstrapped difference tests (*α* = 0.05) between edge-weights that were non-zero in the estimated network for entire cohort


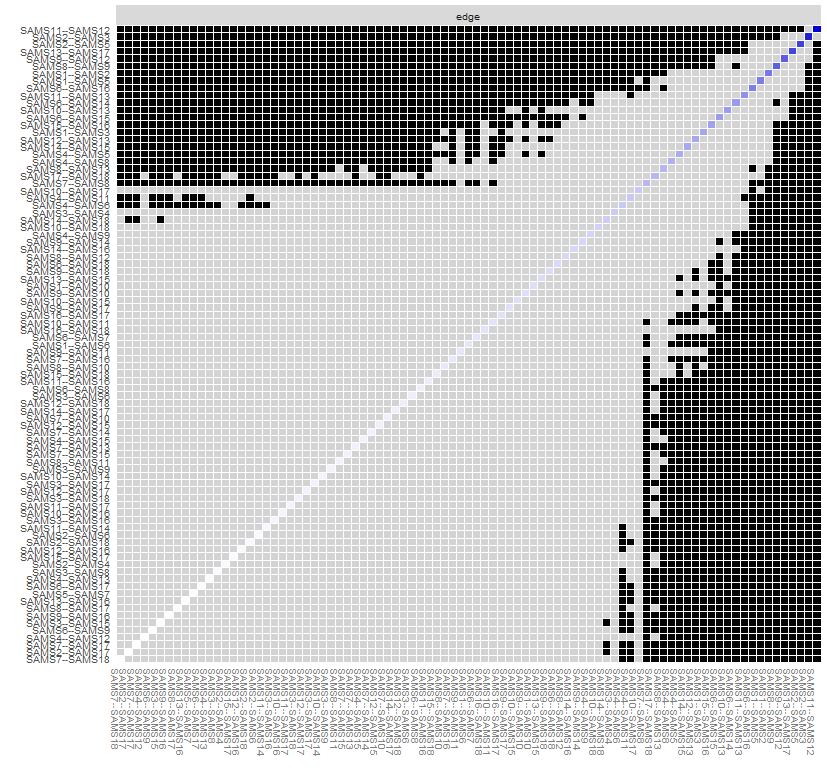


Note: Gray boxes indicate edges that do not differ significantly from one-another. Black boxes represent edges that do differ significantly from one-another. Colored boxes correspond to the color of the edge in the network plot (figure 1 in main text).

# Supplementary Figure 7 A-D. Separate Network Analyses for each dataset


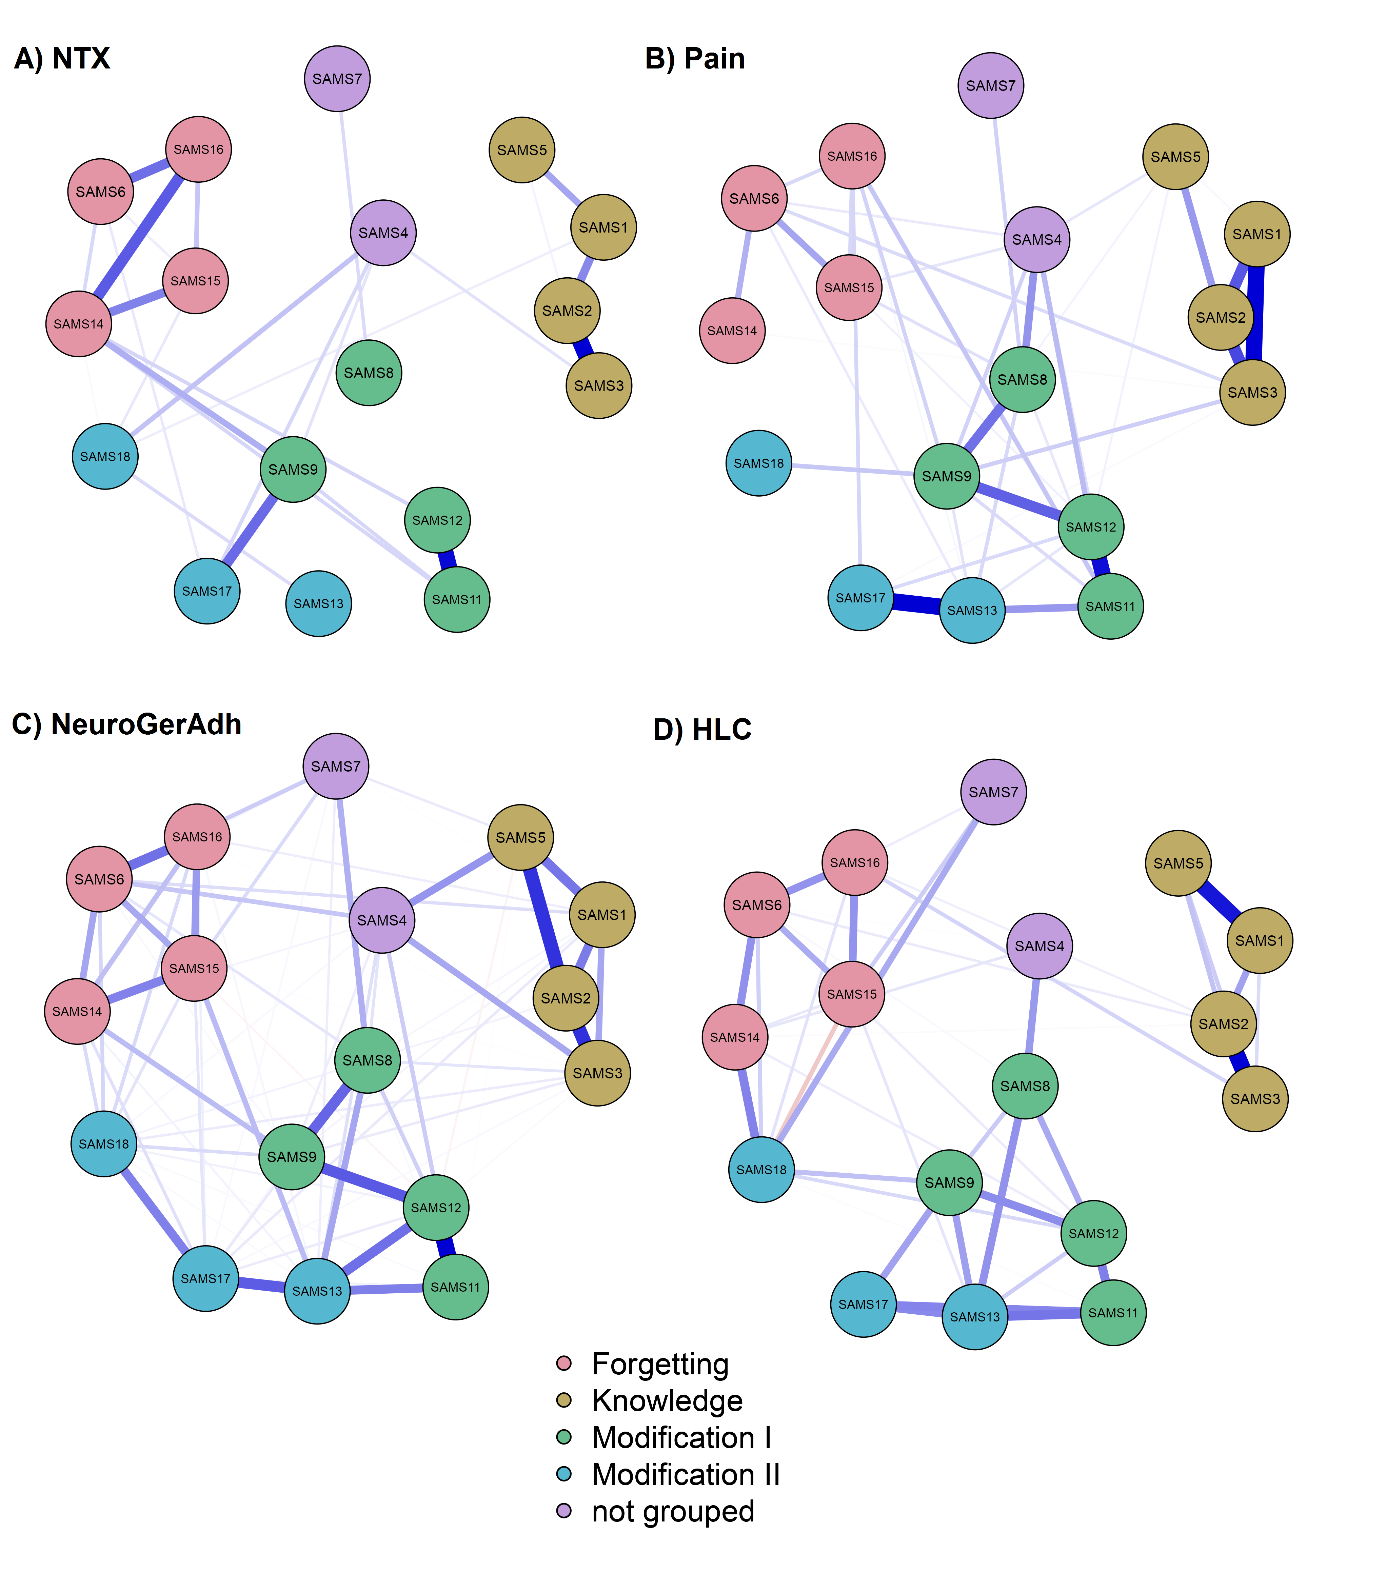

Supplement: Supplementary file 1 [file get_supplementary_file.php]
